# Supplementary material for: Greater Phage Genotypic Diversity Constrains Arms-Race Coevolution
Source: PubMed Central journal article supplement (PMC8931298; doi:10.3389/fcimb.2022.834406), 2022-03-04
Supplement: DataSheet_1.pdf [file DataSheet_1.pdf]

# **Supplementary material: Greater phage genotypic diversity constrains arms-race coevolution**

## **Authors**

Meaghan Castledine<sup>1</sup>, Pawel Sierocinski<sup>1</sup>, Mhairi Inglis<sup>1</sup>, Suzanne Kay<sup>1</sup>, Alex Hayward<sup>1</sup>,  
Angus Buckling<sup>1</sup>, Daniel Padfield<sup>1</sup>

## **Corresponding author**

Meaghan Castledine: mcastledine96@gmail.com

## **Contents:**

Table S1. Multiple contrasts of bacterial resistance to their contemporary phage over time within each treatment.

Table S2. Means and standard errors of phage susceptible and resistant bacterial clones over time, within each treatment.

Table S3. Multiple contrasts of bacterial resistance to phage over time within each treatment.

## Tables

Table S1. Multiple pairwise comparisons comparing the probability of a bacterial clone being susceptible to its contemporary phage through time (1, 2 and 3 corresponding to days 4, 8 and 12). Tests performed on the log odds ratio scale and p-values adjusted using the Tukey method of comparing a family of three estimates. Significant contrasts in bold. Phage 1, P1; Phage 2; P2. Values given to 3 significant figures.

| Treatment            | Time contrast | Odds-ratio           | SE               | z-ratio         | p-value           |
|----------------------|---------------|----------------------|------------------|-----------------|-------------------|
| <b>Phage 1</b>       | <b>1 / 2</b>  | <b>0.08660000000</b> | <b>0.0579000</b> | <b>-3.66000</b> | <b>0.00074700</b> |
| Phage 1              | 1 / 3         | 0.25500000000        | 0.1730000        | -2.02000        | 0.10800000        |
| Phage 1              | 2 / 3         | 2.94000000000        | 1.5100000        | 2.10000         | 0.08990000        |
| Phage 2              | 1 / 2         | 0.00000000812        | 0.0000354        | -0.00427        | 1.00000000        |
| Phage 2              | 1 / 3         | 0.00000000571        | 0.0000249        | -0.00435        | 1.00000000        |
| Phage 2              | 2 / 3         | 0.70300000000        | 0.4320000        | -0.57300        | 0.83500000        |
| <b>Phage 1 and 2</b> | <b>1 / 2</b>  | <b>0.06480000000</b> | <b>0.0538000</b> | <b>-3.30000</b> | <b>0.00282000</b> |
| <b>Phage 1 and 2</b> | <b>1 / 3</b>  | <b>0.01870000000</b> | <b>0.0157000</b> | <b>-4.76000</b> | <b>0.00000583</b> |
| <b>Phage 1 and 2</b> | <b>2 / 3</b>  | <b>0.28900000000</b> | <b>0.1240000</b> | <b>-2.90000</b> | <b>0.01030000</b> |

Table S2. The proportion of phage susceptible and resistant bacterial populations when tested between three bacteria and phage time points (Tp) in each treatment. Values given to 3 significant figures.

| Treatment     | Bacteria Tp | Phage Tp | Susceptible | Resistant | SE      |
|---------------|-------------|----------|-------------|-----------|---------|
| Phage 1       | Day 4       | Day 4    | 0.02780     | 0.972     | 0.01180 |
| Phage 1       | Day 4       | Day 8    | 0.07640     | 0.924     | 0.06920 |
| Phage 1       | Day 4       | Day 12   | 0.00694     | 0.993     | 0.00694 |
| Phage 1       | Day 8       | Day 4    | 0.34000     | 0.660     | 0.11800 |
| Phage 1       | Day 8       | Day 8    | 0.13900     | 0.861     | 0.07970 |
| Phage 1       | Day 8       | Day 12   | 0.07640     | 0.924     | 0.06920 |
| Phage 1       | Day 12      | Day 4    | 0.31200     | 0.688     | 0.10800 |
| Phage 1       | Day 12      | Day 8    | 0.13900     | 0.861     | 0.08350 |
| Phage 1       | Day 12      | Day 12   | 0.07640     | 0.924     | 0.06920 |
| Phage 2       | Day 4       | Day 4    | 0.00000     | 1.000     | 0.00000 |
| Phage 2       | Day 4       | Day 8    | 0.00000     | 1.000     | 0.00000 |
| Phage 2       | Day 4       | Day 12   | 0.04170     | 0.958     | 0.04170 |
| Phage 2       | Day 8       | Day 4    | 0.09720     | 0.903     | 0.04790 |
| Phage 2       | Day 8       | Day 8    | 0.04170     | 0.958     | 0.03480 |
| Phage 2       | Day 8       | Day 12   | 0.00000     | 1.000     | 0.00000 |
| Phage 2       | Day 12      | Day 4    | 0.31200     | 0.688     | 0.11400 |
| Phage 2       | Day 12      | Day 8    | 0.23600     | 0.764     | 0.09500 |
| Phage 2       | Day 12      | Day 12   | 0.05560     | 0.944     | 0.04270 |
| Phage 1 and 2 | Day 4       | Day 4    | 0.01390     | 0.986     | 0.01390 |
| Phage 1 and 2 | Day 4       | Day 8    | 0.06250     | 0.938     | 0.04120 |
| Phage 1 and 2 | Day 4       | Day 12   | 0.04860     | 0.951     | 0.02800 |
| Phage 1 and 2 | Day 8       | Day 4    | 0.13900     | 0.861     | 0.05830 |
| Phage 1 and 2 | Day 8       | Day 8    | 0.11800     | 0.882     | 0.06680 |
| Phage 1 and 2 | Day 8       | Day 12   | 0.09720     | 0.903     | 0.06790 |
| Phage 1 and 2 | Day 12      | Day 4    | 0.18100     | 0.819     | 0.08870 |
| Phage 1 and 2 | Day 12      | Day 8    | 0.16000     | 0.840     | 0.07910 |
| Phage 1 and 2 | Day 12      | Day 12   | 0.22200     | 0.778     | 0.09960 |

Table S3. Multiple pairwise comparisons comparing the probability of a bacterial clone being phage susceptible over time (1, 2 and 3 corresponding to days 4, 8 and 12) within each treatment. Tests performed on the log odds ratio scale and p-values adjusted using the Tukey method of comparing a family of three estimates. Significant contrasts in bold. Values given to 3 significant figures.

| Treatment      | Contrast     | Odds-ratio    | SE            | z-ratio       | p-value         |
|----------------|--------------|---------------|---------------|---------------|-----------------|
| <b>Phage 1</b> | <b>1 / 2</b> | <b>10.600</b> | <b>10.300</b> | <b>2.4500</b> | <b>0.037800</b> |
| <b>Phage 1</b> | <b>1 / 3</b> | <b>68.700</b> | <b>73.700</b> | <b>3.9400</b> | <b>0.000237</b> |
| Phage 1        | 2 / 3        | 6.460         | 7.160         | 1.6800        | 0.212000        |
| Phage 2        | 1 / 2        | 2.680         | 2.720         | 0.9740        | 0.593000        |
| <b>Phage 2</b> | <b>1 / 3</b> | <b>15.200</b> | <b>17.500</b> | <b>2.3700</b> | <b>0.047000</b> |
| Phage 2        | 2 / 3        | 5.680         | 6.680         | 1.4800        | 0.302000        |
| Phage 1 and 2  | 1 / 2        | 0.950         | 0.899         | -0.0547       | 0.998000        |
| Phage 1 and 2  | 1 / 3        | 0.598         | 0.561         | -0.5480       | 0.847000        |
| Phage 1 and 2  | 2 / 3        | 0.630         | 0.590         | -0.4940       | 0.874000        |
